# Supplementary material for: Pharmacological Inhibition of miR-130 Family Suppresses Bladder Tumor Growth by Targeting Various Oncogenic Pathways via PTPN1
Source: MDPI journal article supplement (doi:10.3390/ijms22094751), 2021-04-29
Supplement: s1 [file s1]

Supplementary information

Supplementary tables

Supplementary table 1

| Term                                                                                | Overlap | P-value | Adjusted P-value | Odds Ratio | Combined Score | Proteins                                |
|-------------------------------------------------------------------------------------|---------|---------|------------------|------------|----------------|-----------------------------------------|
| Thymic Stromal Lymphopoietin (TSLP) Signaling Pathway WP2203                        | 6/47    | 2.E-09  | 3.E-07           | 64,74      | 1296,42        | LYN;YES1;SRC;LCK;FYN;MAPK14             |
| NRF2-ARE regulation WP4357                                                          | 4/21    | 3.E-07  | 3.E-05           | 89,27      | 1334,97        | YES1;SRC;INSR;FYN                       |
| EGF/EGFR Signaling Pathway WP437                                                    | 6/162   | 3.E-06  | 2.E-04           | 16,92      | 212,87         | SRC;PRKCD;ABI1;INPPL1;MAPK14;BCAR1      |
| B Cell Receptor Signaling Pathway WP23                                              | 5/97    | 5.E-06  | 2.E-04           | 23,46      | 287,51         | LYN;LCK;PRKCD;FYN;MAPK14                |
| Kit receptor signaling pathway WP304                                                | 4/59    | 2.E-05  | 4.E-04           | 30,78      | 341,14         | LYN;SRC;FYN;MAPK14                      |
| Genotoxicity pathway WP4286                                                         | 4/63    | 2.E-05  | 4.E-04           | 28,69      | 310,45         | HIST1H2BN;HIST1H2BM;HIST1H2BB;HIST1H2BC |
| Oncostatin M Signaling Pathway WP2374                                               | 4/65    | 2.E-05  | 4.E-04           | 27,75      | 296,79         | SRC;PRKCD;CDK2;MAPK14                   |
| AGE/RAGE pathway WP2324                                                             | 4/66    | 2.E-05  | 4.E-04           | 27,30      | 290,33         | SRC;INSR;PRKCD;MAPK14                   |
| Human Thyroid Stimulating Hormone (TSH) signaling pathway WP2032                    | 4/66    | 2.E-05  | 4.E-04           | 27,30      | 290,33         | SRC;CDK2;MAPK14;IGF1R                   |
| Insulin Signaling WP481                                                             | 5/160   | 5.E-05  | 8.E-04           | 13,88      | 136,47         | INSR;PRKCD;INPPL1;MAPK14;IGF1R          |
| Signaling Pathways in Glioblastoma WP2261                                           | 4/82    | 6.E-05  | 8.E-04           | 21,68      | 212,02         | SRC;PRKCD;CDK2;IGF1R                    |
| Alpha 6 Beta 4 signaling pathway WP244                                              | 3/33    | 8.E-05  | 1.E-03           | 41,50      | 391,09         | SRC;PRKCD;MAPK14                        |
| T-Cell antigen Receptor (TCR) Signaling Pathway WP69                                | 4/90    | 8.E-05  | 1.E-03           | 19,66      | 185,06         | LCK;PRKCD;FYN;MAPK14                    |
| Pathways Regulating Hippo Signaling WP4540                                          | 4/98    | 1.E-04  | 1.E-03           | 17,98      | 163,29         | INSR;PRKCD;IGF1R;EPHA2                  |
| Focal Adhesion WP306                                                                | 5/198   | 1.E-04  | 2.E-03           | 11,13      | 98,21          | SRC;FYN;BCAR1;IGF1R;PPP1CA              |
| Interleukin-11 Signaling Pathway WP2332                                             | 3/44    | 2.E-04  | 2.E-03           | 30,35      | 259,69         | YES1;SRC;FYN                            |
| Hippo-Medlin Signaling Dysregulation WP4541                                         | 4/120   | 2.E-04  | 2.E-03           | 14,55      | 120,82         | INSR;IGF1R;EPHA2;PPP1CA                 |
| IL-3 Signaling Pathway WP286                                                        | 3/49    | 3.E-04  | 2.E-03           | 27,04      | 222,72         | LYN;SRC;FYN                             |
| VEGFA-VEGFR2 Signaling Pathway WP3888                                               | 5/236   | 3.E-04  | 3.E-03           | 9,28       | 74,35          | SRC;PRKCD;FYN;MAPK14;BCAR1              |
| Interferon type I signaling pathways WP585                                          | 3/54    | 4.E-04  | 3.E-03           | 24,38      | 193,80         | LCK;FYN;MAPK14                          |
| TGF-beta Signaling Pathway WP366                                                    | 4/132   | 4.E-04  | 3.E-03           | 13,18      | 104,64         | SRC;CDK1;MAPK14;BCAR1                   |
| RANKL/RANK (Receptor activator of NFkB (ligand)) Signaling Pathway WP2018           | 3/55    | 4.E-04  | 3.E-03           | 23,91      | 188,77         | LYN;SRC;MAPK14                          |
| Brain-Derived Neurotrophic Factor (BDNF) signaling pathway WP2380                   | 4/144   | 5.E-04  | 4.E-03           | 12,04      | 91,64          | SRC;PRKCD;FYN;MAPK14                    |
| Prolactin Signaling Pathway WP2037                                                  | 3/76    | 1.E-03  | 6.E-03           | 17,02      | 118,19         | SRC;FYN;MAPK14                          |
| Leptin signaling pathway WP2034                                                     | 3/76    | 1.E-03  | 6.E-03           | 17,02      | 118,19         | SRC;FYN;MAPK14                          |
| Type II diabetes mellitus WP1584                                                    | 2/22    | 1.E-03  | 9.E-03           | 40,67      | 266,53         | INSR;PRKCD                              |
| Angiogenesis WP1539                                                                 | 2/24    | 2.E-03  | 1.E-02           | 36,97      | 235,82         | SRC;MAPK14                              |
| Follicle Stimulating Hormone (FSH) signaling pathway WP2035                         | 2/27    | 2.E-03  | 1.E-02           | 32,53      | 199,83         | SRC;MAPK14                              |
| Integrin-mediated Cell Adhesion WP185                                               | 3/101   | 2.E-03  | 1.E-02           | 12,66      | 77,57          | SRC;FYN;BCAR1                           |
| Nanoparticle-mediated activation of receptor signaling WP2643                       | 2/28    | 2.E-03  | 1.E-02           | 31,28      | 189,87         | SRC;MAPK14                              |
| Senescence and Autophagy in Cancer WP615                                            | 3/105   | 2.E-03  | 1.E-02           | 12,16      | 73,17          | SRC;MAPK14;IGF1R                        |
| T-Cell Receptor and Co-stimulatory Signaling WP2583                                 | 2/29    | 2.E-03  | 1.E-02           | 30,12      | 180,72         | LCK;FYN                                 |
| Ebola Virus Pathway on Host WP4217                                                  | 3/129   | 4.E-03  | 2.E-02           | 9,83       | 53,45          | TYRO3;MERTK;IGF1R                       |
| ATM Signaling Pathway WP2516                                                        | 2/40    | 5.E-03  | 2.E-02           | 21,39      | 114,76         | CDK2;CDK1                               |
| IL-2 Signaling Pathway WP49                                                         | 2/42    | 5.E-03  | 2.E-02           | 20,32      | 107,07         | LCK;FYN                                 |
| Metabolic reprogramming in colon cancer WP4290                                      | 2/42    | 5.E-03  | 2.E-02           | 20,32      | 107,07         | LDHA;GART                               |
| Integrated Cancer Pathway WP1971                                                    | 2/44    | 6.E-03  | 2.E-02           | 19,35      | 100,20         | CDK2;CDK1                               |
| Aryl Hydrocarbon Receptor WP2586                                                    | 2/46    | 6.E-03  | 3.E-02           | 18,46      | 94,03          | SRC;CDK2                                |
| Regulation of Microtubule Cytoskeleton WP2038                                       | 2/46    | 6.E-03  | 3.E-02           | 18,46      | 94,03          | SRC;CDK1                                |
| Chemokine signaling pathway WP3929                                                  | 3/164   | 8.E-03  | 3.E-02           | 7,68       | 36,67          | LYN;PRKCD;BCAR1                         |
| RIG-I-like Receptor Signaling WP3865                                                | 2/60    | 1.E-02  | 4.E-02           | 14,00      | 64,09          | DDX17;MAPK14                            |
| Notch Signaling Pathway WP61                                                        | 2/61    | 1.E-02  | 4.E-02           | 13,76      | 62,57          | LCK;SRC                                 |
| T-Cell antigen Receptor (TCR) pathway during Staphylococcus aureus infection WP3863 | 2/62    | 1.E-02  | 4.E-02           | 13,53      | 61,10          | LCK;FYN                                 |
| PI3K-Akt Signaling Pathway WP4172                                                   | 4/340   | 1.E-02  | 4.E-02           | 4,97       | 22,43          | INSR;CDK2;IGF1R;EPHA2                   |
| Ras Signaling WP4223                                                                | 3/184   | 1.E-02  | 4.E-02           | 6,83       | 30,46          | INSR;IGF1R;EPHA2                        |
| G1 to S cell cycle control WP45                                                     | 2/64    | 1.E-02  | 4.E-02           | 13,09      | 58,33          | CDK2;CDK1                               |
| Folate Metabolism WP176                                                             | 2/66    | 1.E-02  | 4.E-02           | 12,68      | 55,75          | INSR;GART                               |
| DNA Damage Response WP707                                                           | 2/68    | 1.E-02  | 4.E-02           | 12,30      | 53,36          | CDK2;CDK1                               |
| RAC1/PAK1/p38/MMP2 Pathway WP3303                                                   | 2/68    | 1.E-02  | 4.E-02           | 12,30      | 53,36          | SRC;MAPK14                              |
| Non-genomic actions of 1,25 dihydroxyvitamin D3 WP4341                              | 2/71    | 1.E-02  | 5.E-02           | 11,76      | 50,06          | PRKCD;MAPK14                            |
| miRNA Regulation of DNA Damage Response WP1530                                      | 2/71    | 1.E-02  | 5.E-02           | 11,76      | 50,06          | CDK2;CDK1                               |
| Primary Focal Segmental Glomerulosclerosis FSGS WP2572                              | 2/72    | 1.E-02  | 5.E-02           | 11,59      | 49,04          | FYN;MKI67                               |
| Robo4 and VEGF Signaling Pathways Crosstalk WP3943                                  | 1/6     | 2.E-02  | 5.E-02           | 79,78      | 333,96         | SRC                                     |
| Somatroph axis (GH) and its relationship to dietary restriction and aging WP4186    | 1/6     | 2.E-02  | 5.E-02           | 79,78      | 333,96         | IGF1R                                   |

Supplementary table 2

| Protein name | # Peptides | # Unique peptides | # protein hitsMS/MS Count | Posterior error probability                                                                                                                                                             | Score                                                                                                                                                                 | Ratio H/L variability |
|--------------|------------|-------------------|---------------------------|-----------------------------------------------------------------------------------------------------------------------------------------------------------------------------------------|-----------------------------------------------------------------------------------------------------------------------------------------------------------------------|-----------------------|
| HMGN4        | 4          | 3                 | 3                         | 1,2458E-17, 5,80E-71                                                                                                                                                                    | 148,44, 273,82                                                                                                                                                        | 14,283                |
| ARPC2        | 6          | 6                 | 6                         | 4,E-03, 3,E-04, 2,E-04                                                                                                                                                                  | 82,287, 82,489, 89,913                                                                                                                                                | 26,36                 |
| HNRNP        | 17         | 10                | 8                         | 1,E-02, 4,E-11, 4,E-11, 3,E-03, 5,E-03, 2,E-05                                                                                                                                          | 45,764, 105,39, 96,123, 62,617, 49,298, 80,312                                                                                                                        | 17,904                |
| BUB3         | 5          | 5                 | 6                         | 3,E-08, 2,E-28, 2,E-08                                                                                                                                                                  | 80,412, 196,37, 86,959                                                                                                                                                | 10,758                |
| SRPRB        | 6          | 6                 | 5                         | 9,E-21, 4,E-23, 3,E-12                                                                                                                                                                  | 138,19, 151,95, 105,79                                                                                                                                                | 30,219                |
| RPL24        | 16         | 16                | 9                         | 1,E-02, 1,E-05, 1,E-05, 6,E-09, 3,E-10                                                                                                                                                  | 62,287, 102,4, 68,168, 117,94, 109,99                                                                                                                                 | 26,775                |
| SRSF3        | 12         | 12                | 17                        | 2,E-03, 1,E-05, 6,E-04, 2,E-10, 3,E-02, 5,E-02, 6,E-12                                                                                                                                  | 76,165, 98,105, 67,11, 82,665, 44,543, 32,518, 162,93                                                                                                                 | 17,974                |
| SRSF2        | 5          | 5                 | 8                         | 1,E-03, 8,E-02, 1,E-04, 5,E-05                                                                                                                                                          | 85,807, 61,325, 84,479, 92,781                                                                                                                                        | 14,526                |
| CAPI         | 11         | 11                | 5                         | 2,E-09, 2,E-09, 2,E-03, 2,E-03, 8,E-34                                                                                                                                                  | 131,35, 124,07, 90,601, 69,846, 192,62                                                                                                                                | 21,029                |
| SFXN1        | 11         | 11                | 10                        | 2,E-02, 9,E-03, 8,E-05                                                                                                                                                                  | 55,776, 84,097, 75,316                                                                                                                                                | 17,22                 |
| WDR1         | 23         | 23                | 10                        | 5,E-93, 3,E-06, 5,E-02, 2,E-10, 4,E-14, 4,E-105, 7,E-02                                                                                                                                 | 246,55, 79,346, 39,645, 130,2, 98,3, 240,07, 64,841                                                                                                                   | 15,041                |
| HISTH1E      | 17         | 3                 | 51                        | 1,E-02, 1,E-12, 5,E-08, 7,E-56, 8,E-08, 3,E-07, 4,E-06, 8,E-04, 2,E-04, 3,E-28, 8,E-37, 1,E-06                                                                                          | 54,898, 112,58, 101,79, 256,93, 87,352, 116,13, 86,498, 124,62, 181,49, 100,93, 86,803, 86,332, 120,9, 138,66, 185,41, 45,347, 127,92, 118,37, 68,107, 171,76, 185,67 | 12,611                |
| HSPA8        | 38         | 33                | 92                        | 2,E-09, 5,E-34, 2,E-07, 5,E-06, 8,E-03, 6,E-10, 9,E-21, 7,E-42, 4,E-02, 8,E-20, 7,E-20, 6,E-03, 2,E-20, 4,E-26, 2,E-16, 3,E-77, 1,E-59, 8,E-57, 1,E-107, 3,E-12, 5,E-33, 1,E-10, 4,E-24 | 110,29, 281,99, 217,71, 183,93, 314,57, 156,08, 177,09 79,949, 133,36                                                                                                 | 19,365                |
| PTPN1        | 4          | 4                 | 6                         | 9,E-06, 4,E-03                                                                                                                                                                          | 78,615, 56,139                                                                                                                                                        | 34,063                |
| TMOD3        | 5          | 5                 | 4                         | 9,E-10, 5,E-02, 1,E-17                                                                                                                                                                  | 131,36, 48,848, 128,74                                                                                                                                                | 23,715                |
| SLC7A5       | 3          | 3                 | 7                         | 2,E-10, 8,E-17                                                                                                                                                                          | 109,79, 135,08                                                                                                                                                        | 17,153                |
| TWF1         | 8          | 8                 | 7                         | 2,E-05, 3,E-02, 4,E-03, 3,E-33                                                                                                                                                          | 89,663, 77,282, 74,29, 181,64                                                                                                                                         | 17,543                |
| HNRNPA0      | 8          | 8                 | 15                        | 1,E-07, 9,E-04, 1,E-16, 1,E-14                                                                                                                                                          | 91,065, 61,265, 126,04, 136,57                                                                                                                                        | 18,961                |
| E1F3I        | 15         | 15                | 16                        | 2,E-03, 2,E-02, 4,E-04, 8,E-06, 1,E-39, 2,E-05                                                                                                                                          | 71,781, 81,92, 75,088, 146,11, 234,85, 79,492                                                                                                                         | 23,302                |
| SHPK         | 6          | 6                 | 4                         | 2,E-04, 3,E-04, 4,E-07                                                                                                                                                                  | 59,372, 68,044, 97,273                                                                                                                                                | 27,929                |
| VCL          | 44         | 44                | 31                        | 1,E-19, 5,E-15, 1,E-03, 1,E-23, 3,E-17, 2,E-11, 7,E-15, 3,E-02, 3,E-08, 8,E-03, 3,E-03, 4,E-26, 4,E-06, 8,E-10 3,E-14, 6,E-02, 4,E-03, 6,E-03, 4,E-03, 5,E-54                           | 127,5, 134,14, 77,597, 154,26, 120,71, 152,32, 119,87 54,823, 121,18, 58,172, 67,214, 181,69, 109,44, 100,11 128,59, 25,408, 104,42, 52,821, 115,49, 245,96           | 14,42                 |
| MAP4         | 22         | 22                | 30                        | 8,E-20, 5,E-03, 9,E-06, 9,E-02, 2,E-08, 7,E-13, 1,E-15 8,E-02, 2,E-04, 5,E-04, 3,E-03, 5,E-10, 2,E-09, 2,E-20 1,E-05, 3,E-04                                                            | 142,85, 68,856, 89,507, 24,229, 153,34, 156,17, 113,65 42,719, 68,283, 54,869, 49,721, 100,69, 101,42, 144,08 69,256, 62,69                                           | 22,567                |
| MAPK1        | 6          | 5                 | 2                         | 7,00E-06                                                                                                                                                                                | 112,84                                                                                                                                                                | 14,533                |
| RPL13A       | 6          | 6                 | 8                         | 2,E-02, 1,E-05, 3,E-04                                                                                                                                                                  | 75,189, 107,21, 82,445                                                                                                                                                | 28,572                |
| CDV3         | 7          | 7                 | 10                        | 2,E-186, 2,E-09, 8,E-34, 1,E-27, 1,E-03, 4,E-94, 6,E-05                                                                                                                                 | 321,96, 110,78, 203,27, 169,66, 85,676, 231,65, 67,396                                                                                                                | 20,744                |
| PTGES3       | 7          | 7                 | 5                         | 2,E-07, 6,E-03, 5,E-02, 3,E-04                                                                                                                                                          | 115,65, 47,712, 71,141, 80,014                                                                                                                                        | 24,273                |
| MAPRE1       | 7          | 7                 | 9                         | 1,E-26, 6,E-41, 3,E-08                                                                                                                                                                  | 143,52, 202,6, 81,917                                                                                                                                                 | 22,254                |
| TIMM50       | 12         | 12                | 15                        | 2,E-33, 3,E-11, 1,E-08, 4,E-07, 3,E-17                                                                                                                                                  | 188,27, 107,03, 127,27, 108,97, 133,94                                                                                                                                | 25,756                |
| PABPN1       | 7          | 7                 | 21                        | 2,E-14, 1,E-41, 2,E-15, 3,E-36                                                                                                                                                          | 127,71, 179,46, 115,39, 154,29                                                                                                                                        | 20,724                |
| MTPN         | 5          | 5                 | 3                         | 3,E-15, 1,E-37                                                                                                                                                                          | 107,75, 199,61                                                                                                                                                        | 13,339                |
| LRPPRC       | 7          | 7                 | 4                         | 8,E-09, 5,E-02                                                                                                                                                                          | 124,62, 32,859                                                                                                                                                        | 21,259                |
| RPL5         | 16         | 16                | 29                        | 3,E-03, 1,E-05, 2,E-02, 2,E-02, 6,E-11, 7,E-02, 3,E-51, 1,E-04, 2,E-12                                                                                                                  | 74,841, 82,651, 100,74, 48,284, 138,21, 41,164, 184,3 93,096, 148,52                                                                                                  | 25,779                |
| METAP1       | 5          | 5                 | 11                        | 3,E-28, 3,E-06, 1,E-44, 7,E-15                                                                                                                                                          | 159,98, 90,793, 195,18, 115,39                                                                                                                                        | 22,265                |
| ADK          | 6          | 6                 | 5                         | 2,E-05, 2,E-02, 4,E-06, 8,E-06                                                                                                                                                          | 101,38, 40,883, 79,639, 80,17                                                                                                                                         | 17,903                |
| ABCE1        | 8          | 8                 | 3                         | 8,E-02, 1,E-10                                                                                                                                                                          | 21,886, 140,91                                                                                                                                                        | 23,293                |
| SERBP1       | 8          | 8                 | 3                         | 6,E-24, 4,E-03                                                                                                                                                                          | 125,65, 47,855                                                                                                                                                        | 25,112                |
| FERMT2       | 4          | 4                 | 3                         | 6,E-24, 4,E-03                                                                                                                                                                          | 125,65, 47,855                                                                                                                                                        | 26,37                 |
| FUBP1        | 14         | 9                 | 17                        | 4,E-07, 9,E-06, 4,E-02, 2,E-21, 2,E-02, 2,E-41                                                                                                                                          | 78,708, 143,61, 45,28, 194,65, 47,774, 177,08                                                                                                                         | 17,083                |
| ERP44        | 3          | 3                 | 4                         | 8,E-05                                                                                                                                                                                  | 103,26                                                                                                                                                                | 14,509                |
| RPS15A       | 4          | 4                 | 7                         | 6,E-04, 1,E-06, 9,E-02, 7,E-44                                                                                                                                                          | 84,507, 97,463, 7,8731, 194,19                                                                                                                                        | 16,459                |
| RPL8         | 25         | 25                | 46                        | 1,E-08, 8,E-26, 4,E-11, 1,E-33, 3,E-03, 1,E-04, 2,E-06, 1,E-04, 5,E-04, 2,E-10, 2,E-02, 9,E-03, 5,E-03, 3,E-03 1,E-02, 1,E-02                                                           | 93,505, 176,44, 104,88, 190,23, 66,056, 83,54, 91,62, 74,987, 147,08, 81,315, 76,17, 48,585, 98,009, 87,639, 97,596, 81,784                                           | 22,179                |

## Supplementary Figures

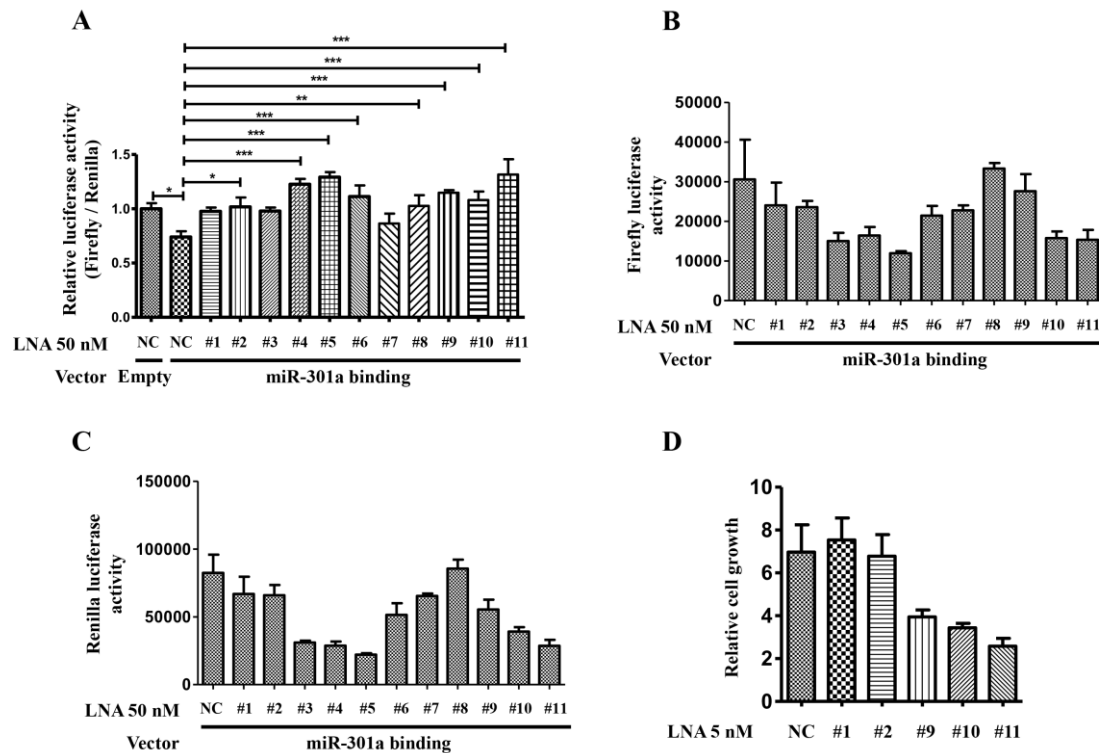

**Supplementary Figure 1. Screening of 10 candidate miR-130 family-targeted LNAs.**

A dual-luciferase reporter assay was performed using 5637 cells transfected with miR-130 family-targeted LNAs. Data were analyzed using one-way ANOVA with Bonferroni post-hoc test \* $p < 0.05$ ; \*\* $p < 0.01$ . Data are presented as the mean  $\pm$  SD ( $n = 3$ ). The results are shown as firefly luciferase activity relative to (Renilla luciferase activity (A), firefly luciferase activity (B), and Renilla luciferase activity (C). (D) The effect of candidate miR-130 family-targeted LNAs on 5637 cell growth was determined using WST-8 reagent. Data are presented as the mean  $\pm$  SD. ( $n = 4$ ). Data were analyzed using one-way ANOVA with Bonferroni post-hoc test \*\* $p < 0.01$ ; \*\*\* $p < 0.001$ .

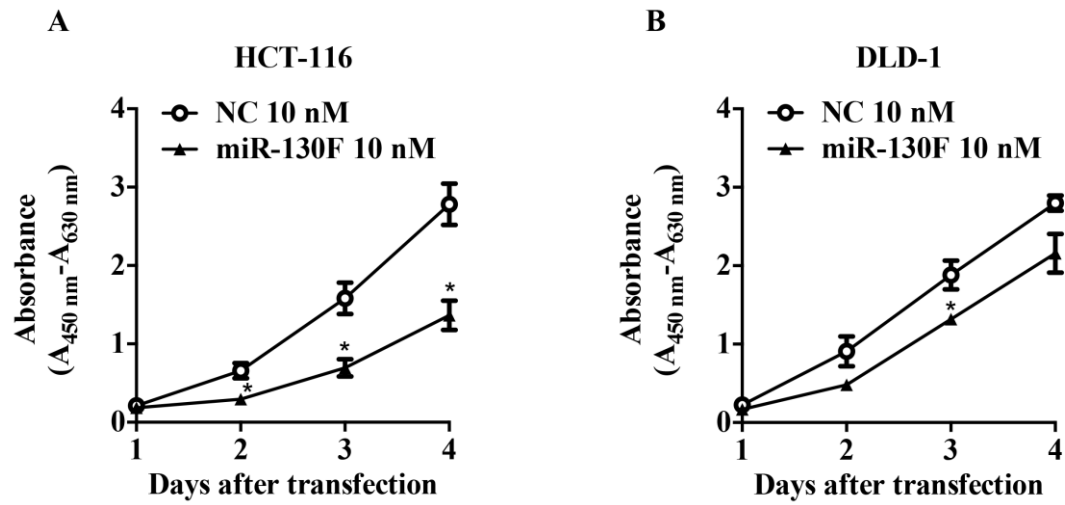

**Supplementary Figure 2. The effect of miR-130 family-targeted LNA (miR-130F) on the proliferation of colon cancer cell lines.**

The effect of miR-130 family-targeted LNA (miR-130F) on the proliferation of HCT-116 (A) or DLD-1 (B) cells was measured using a WST-8 assay. Data are presented as the mean  $\pm$  SD (n = 3). Data were analyzed using Unpaired t test \*p < 0.05.

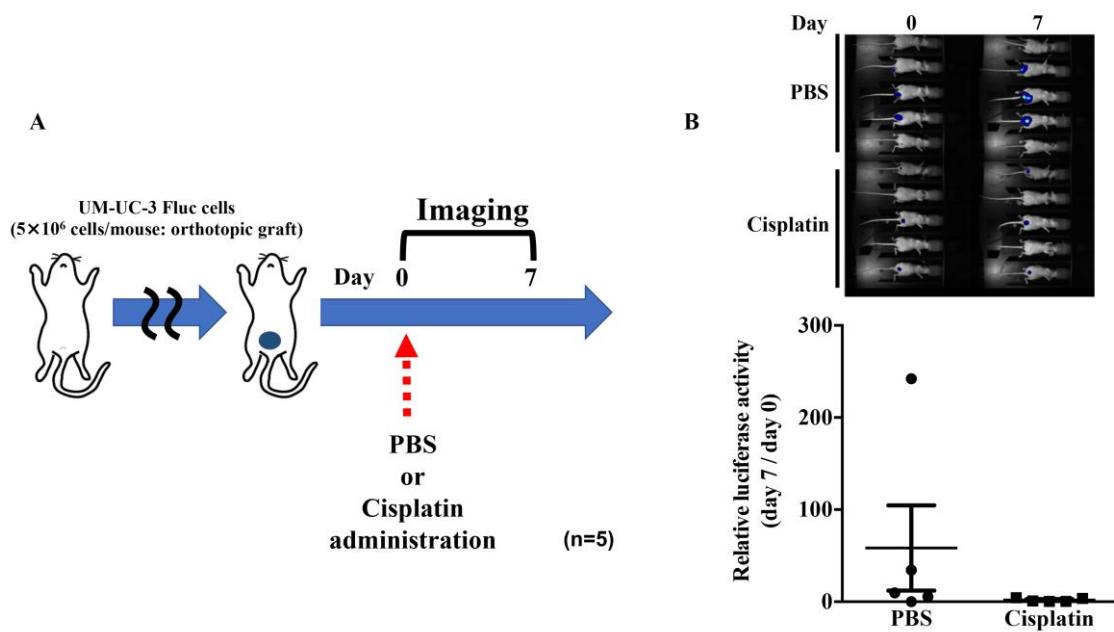

**Supplementary Figure 3. Verification of an orthotopic bladder cancer model using**

**cisplatin.** (A) Scheme of miR-130 family-targeted LNA challenge in an orthotopic

bladder cancer model. PBS or cisplatin was administered in UM-UC-3 cell-inoculated

mice at a dose of 10 mg/kg. (B) Relative tumor volume was measured by *in vivo* imaging.

Data are presented as the mean  $\pm$  SD. (n = 5).

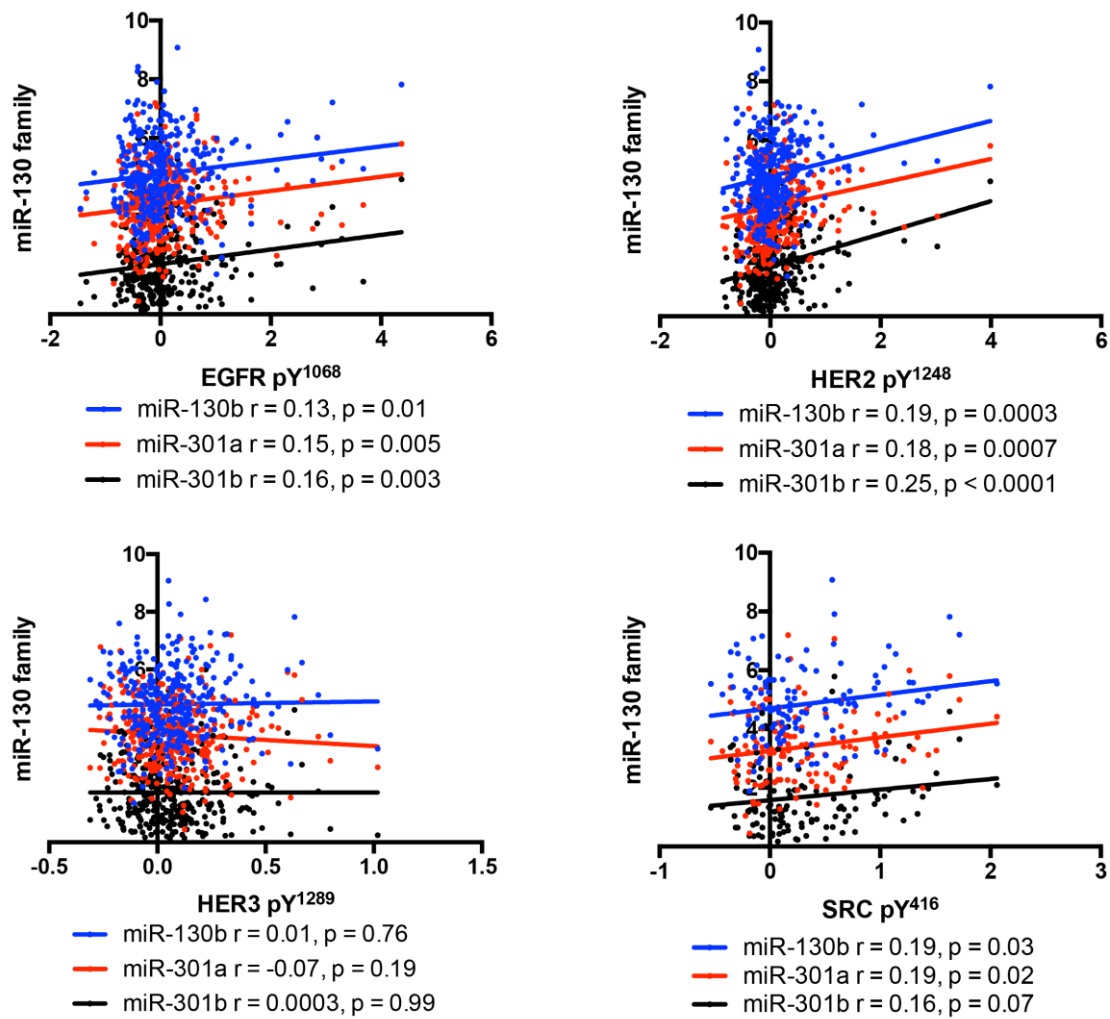

**Supplementary Figure 4. Correlation analysis of the expressions between miR-130 family and phosphorylated receptor tyrosine kinases in bladder cancer specimens.**

Correlation analysis was conducted using University of California, Santa Cruz (UCSC)

Xena database (<http://xena.ucsc.edu>).

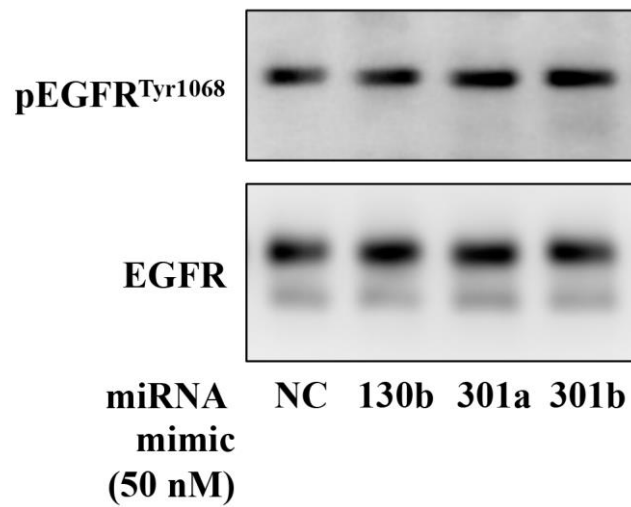

**Supplementary Figure 5. The effect of miR-130 family mimics on EGFR phosphorylation levels.**

miR-130 family mimics were transfected into UM-UC-2 cells. Protein expression levels of pEGFR<sup>Tyr1068</sup> were evaluated by western blot analysis. Representative pictures of three independent experiments are shown. Uncropped western blot data are shown in Supplementary Fig. 6.

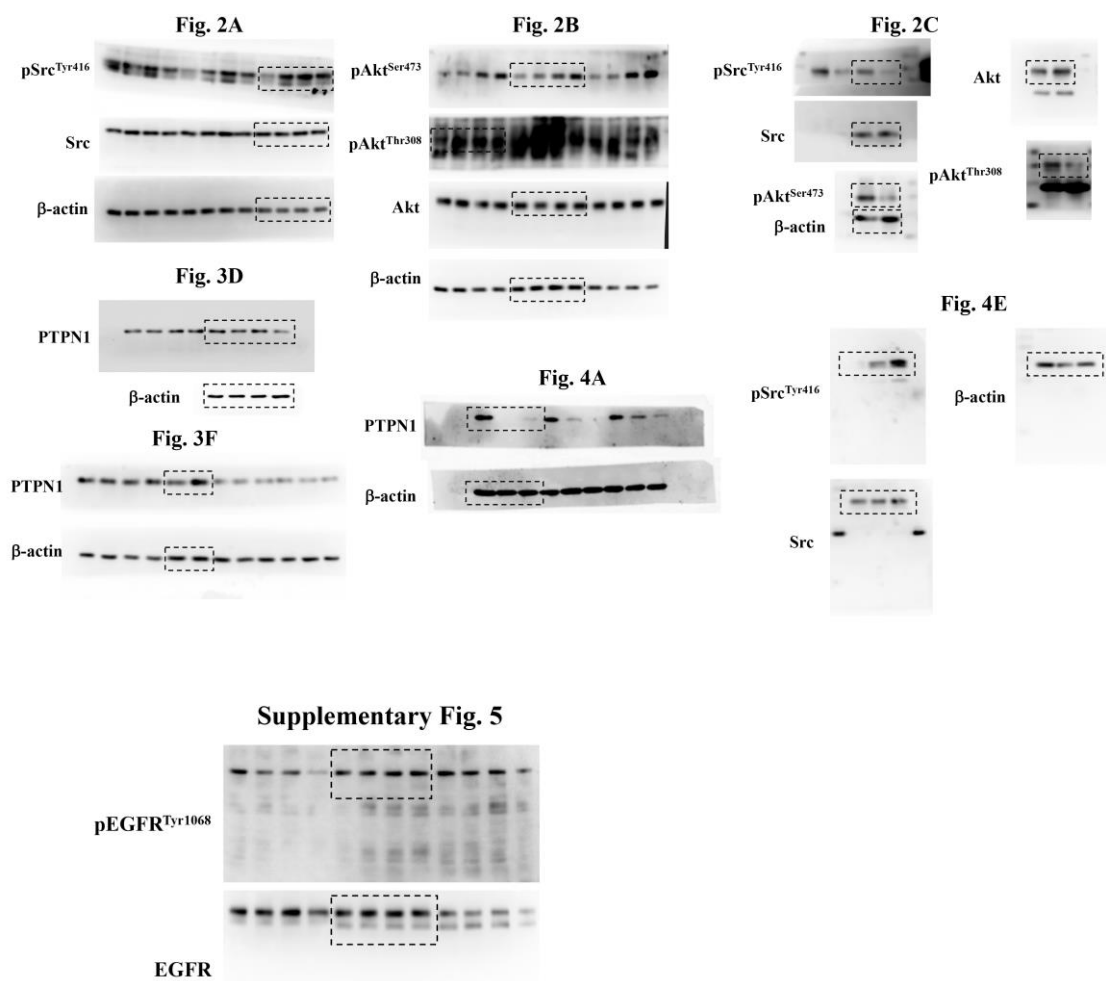

**Supplementary Figure 6. Uncropped western blot data.**
